# Supplementary material
Source: PubMed Central journal article supplement (PMC4911305)
Supplement: NIHMS779820-supplement-1.pdf [file NIHMS779820-supplement-1.pdf]

## Supplemental Figure 1

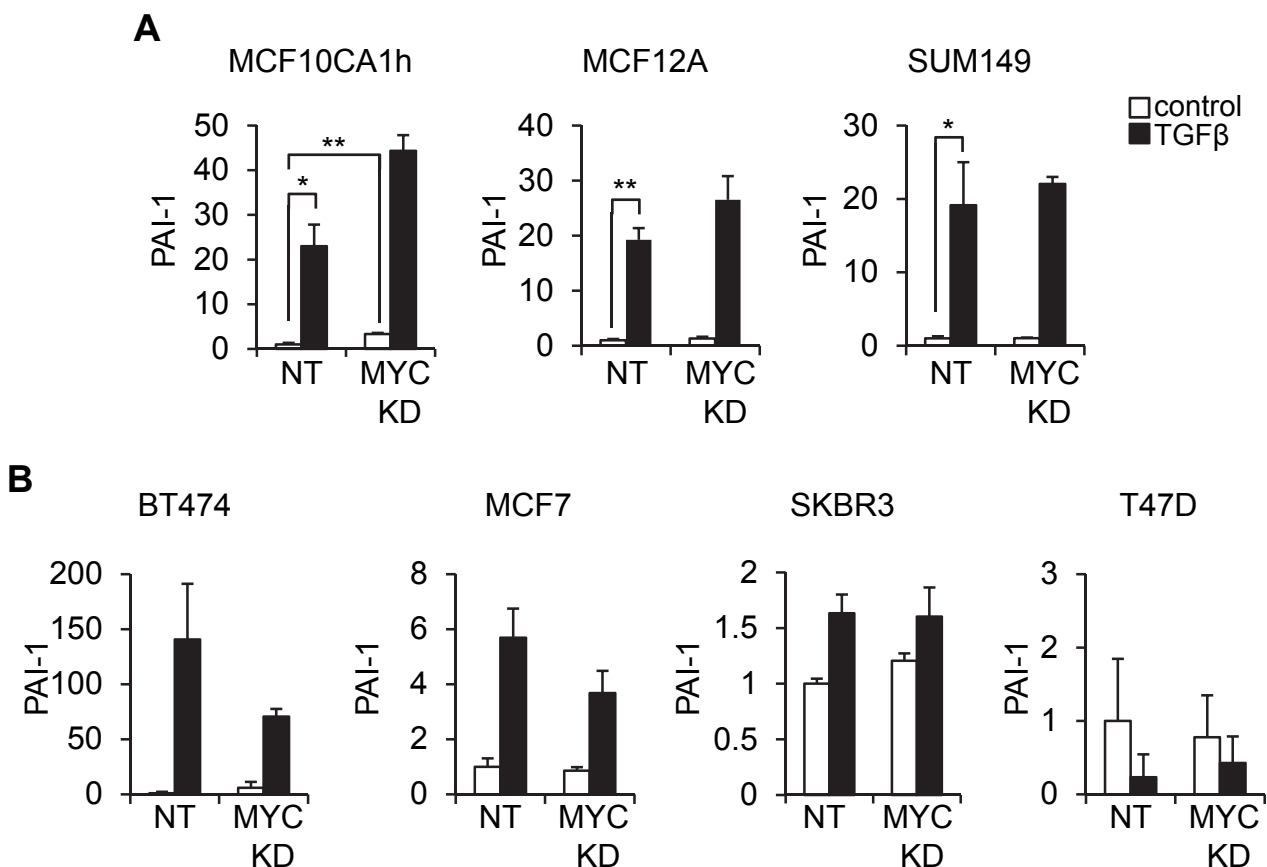

**Supplemental Figure 1. Responsiveness of different molecular subtypes breast cancer cell lines to TGFβ as measured by PAI-1 expression levels.** Indicated cell lines of basal (A) and luminal (B) breast cancer intrinsic subtypes were transduced with non-target (NT) or MYC shRNA (MYC KD), and treated with TGFβ as indicated. PAI-1 transcript levels are presented as relative quantification, normalized to GAPDH. Error bars, SEM; \* p < 0.05; \*\* p < 0.01.

## Supplemental Figure 2

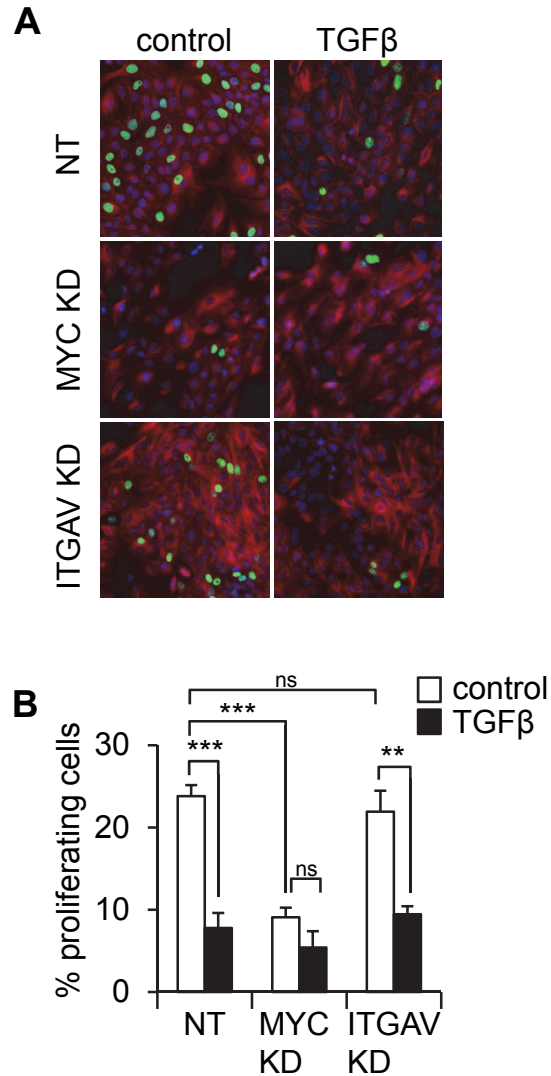

**Supplemental Figure 2. TGFβ and MYC knockdown inhibit cell proliferation.** (A) TGFβ and MYC KD inhibit EdU incorporation, but knockdown of integrin  $\alpha v$  (ITGAV) does not. Representative pictures showing proliferating cells (in green). Scale bars, 50  $\mu\text{m}$ . (B) Quantification of EdU positive cells compared to total number of cells. Error bars, SEM; \*  $p < 0.05$ ; \*\*  $p < 0.01$ ; \*\*\*  $p < 0.001$ .

### Supplemental Figure 3

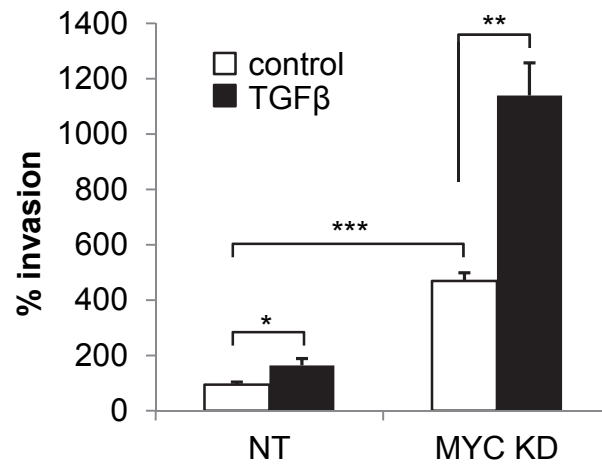

**Supplemental Figure 3. MYC reduction potentiates TGFβ induced invasive phenotype in SUM149 cells.** TGFβ treatment and MYC knockdown stimulate invasion of SUM149 cells through a potentiation effect. Data plotted as error±SEM, \*, p<0.05; \*\*, p<0.01; \*\*\*, p<0.005.

## Supplemental Figure 4

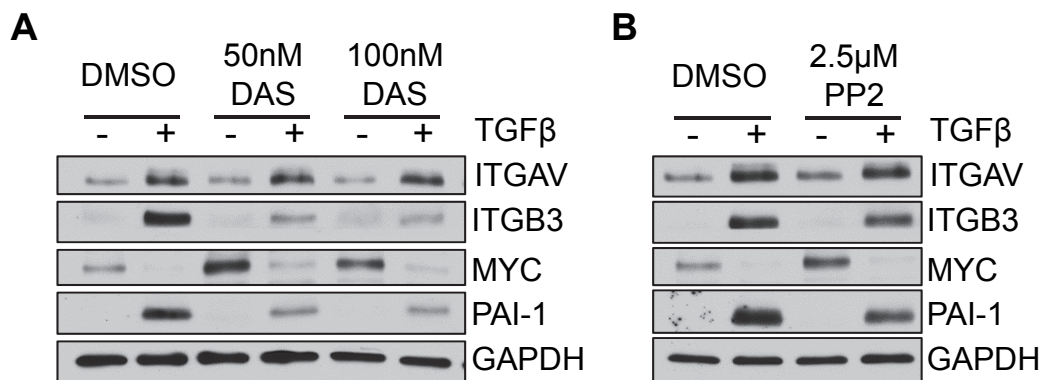

**Supplemental Figure 4. Pharmacological inhibition of SRC blocks the potentiation effect of simultaneous MYC knockdown and TGFβ treatment on increased levels of integrin αβ3.** MCF10A cells were treated with pharmacological inhibitors of SRC, Dasatinib (A) and PP2 (B), for 72h. Levels of indicated proteins were assessed by western blot.

## Supplemental Figure 5

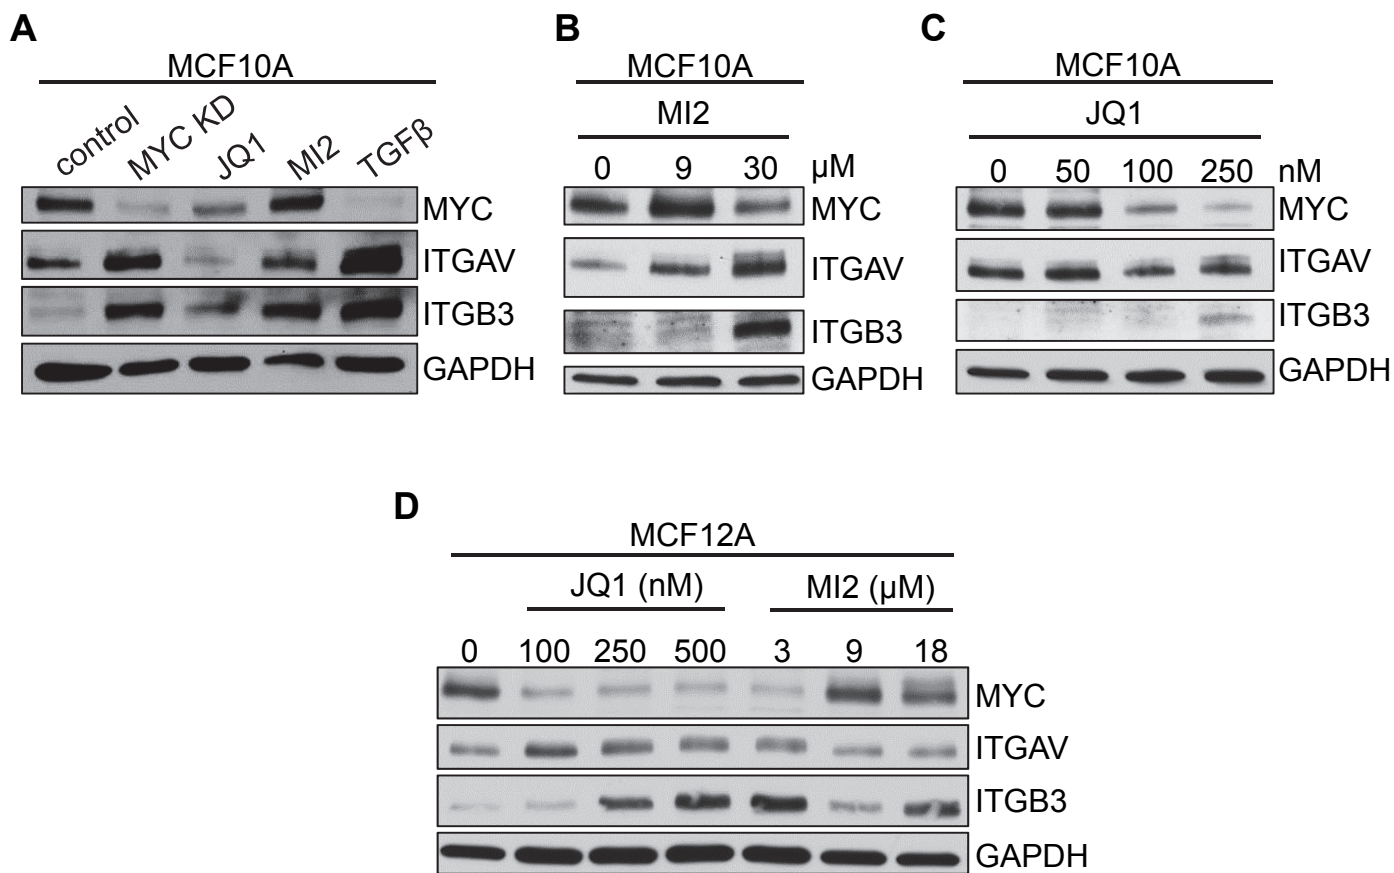

**Supplemental Figure 5. Pharmacological inhibition of MYC mimics the effect of MYC knockdown on integrin  $\alpha\beta 3$  levels, in a dose dependent manner.** (A) MCF10A cells were lentivirally transduced with either non-target or MYC targeting shRNAs and treated with MYC inhibitors, JQ1 (250 nM) or MI2 (30  $\mu\text{M}$ ), for 72h or with TGF $\beta$  (25 ng/ml) for 18h. Protein levels were assessed by western blot. (B-C) In MCF10A cells, increasing concentrations of MI2 (B) and JQ1 (C) progressively increase levels of integrin  $\alpha\beta 3$ . (D) Treatment of MCF12A cells with increasing concentrations of JQ1 or MI2, progressively increases levels of integrin  $\alpha\beta 3$ .
